# Supplementary material for: Fallopian Tube Lesions in Women at High Risk for Ovarian Cancer: A Multicenter Study
Source: Oxford University Press journal article supplement (doi:10.1158/1940-6207.capr-18-0009), 2018-09-19
Supplement: 19406207capr180009-sup-bettysupplement2.docx [file 19406207capr180009-sup-bettysupplement2.docx]

**Supplement 2:** Additional characteristics of the 400 women from Part 1 of the study.

**Supplement 2. Additional characteristics of women with and without STICs and/or invasive cancer in the fallopian tubes**

| **Characteristics** | **No STIC and/or Invasive Cancer (n=377)**  **n (%)** | **STIC and/or Invasive Cancer**  **(n=23)**  **n (%)** | **P-value (c)** |
| --- | --- | --- | --- |
| **Mean age at Menarche, years (SD)** | 12.7 (1.5) | 12.6 (1.9) | 0.76 |
| **Ashkenazi Jewish Ancestry** |  |  | 0.64 |
| **No** | 207 (54.8) | 14 (62.5) |  |
| **Yes** | 117 (31.0) | 6 (25.0) |  |
| **Missing** | 53 (14.3) | 3 (12.5) |  |
| **Menopausal Status** |  |  | 0.27 |
| **Premenopausal** | 228 (60.6) | 11 (50.0) |  |
| **Post-menopausal** | 146 (38.6) | 12 (50.0) |  |
| **Missing** | 3 (0.8) | 0 (0.0) |  |
| **Fibroids** |  |  | 0.34 |
| **Never** | 325 (86.2) | 21 (87.5) |  |
| **Ever** | 49 (13.0) | 1 (4.2) |  |
| **Missing** | 3 (0.8) | 1 (8.3) |  |
| **Smoking(a)** |  |  | 1.00 |
| **Never** | 242 (64.3) | 15 (66.7) |  |
| **Ever** | 128 (33.9) | 8 (33.3) |  |
| **Missing** | 7 (1.9) | 0 (0.0) |  |
| **Talcum Powder(b)** |  |  | 0.54 |
| **Never** | 194 (51.3) | 17 (70.8) |  |
| **Ever** | 43 (11.4) | 2 (12.5) |  |
| **Missing** | 140 (37.3) | 4 (16.7) |  |
| **Body Mass Index (kg/m2 )** |  |  | 0.28 |
| **≤ 25** | 164 (43.4) | 5 (25.0) |  |
| **> 25** | 145 (38.6) | 9 (37.5) |  |
| **Missing** | 68 (18.0) | 9 (37.5) |  |
| **Alcohol Use(a)** |  |  | 0.12 |
| **Never** | 125 (33.3) | 4 (16.7) |  |
| **Ever** | 246 (65.1) | 19 (83.3) |  |
| **Missing** | 6 (1.6) | 0 (0.0) |  |

All values were age standardized. For groups with 0 in one category Fisher exact test was used. Abbreviations: RRSO, risk reduction salpingo- oophorectomy; SD, standard deviation; STIC, serous tubal intraepithelial carcinoma; STIL, serous tubal intraepithelial lesion.  (a) Collected on closest date prior to prophylactic oophorectomy, (b) Only collected from Hopkins and Toronto, (c) all p values are based on Fisher Exact test
