# Supplementary material for: Fallopian Tube Lesions in Women at High Risk for Ovarian Cancer: A Multicenter Study
Source: Oxford University Press journal article supplement (doi:10.1158/1940-6207.capr-18-0009), 2018-09-19
Supplement: 19406207capr180009-sup-bettysupplement3101818.docx [file 19406207capr180009-sup-bettysupplement3101818.docx]

**Supplement 3:** Baseline characteristics for the 105 women that underwent extensive sampling of the fallopian tube.

**Supplement 3: Characteristics of women who underwent additional sampling (N =105)**

| **Characteristics** | **No Lesion (n=92)**  **N (%)** | **STIC/STILs and/or Cancer (n=6)**  **N (%)** | **P53 signatures alone**  **(n=7)**  **N (%)** |
| --- | --- | --- | --- |
|  |  |  |  |
| **Mean Age, years (SD)** | 47.1 (8.9) | 53.8 (11.7) | 47.4 (6.6) |
| **BRCA mutation status** |  |  |  |
| **BRCA 1 Positive** | 39 (42.4) | 2 (33.3) | 2 (28.6) |
| **BRCA 2 Positive** | 35 (38.0) | 4 (66.7) | 3 (42.9) |
| **VUS/Negative** | 16 (17.4) | 0 (0.0) | 2 (28.6) |
| **Missing** | 2 (2.2) | 0 (0.0) | 0 (0.0) |
| **History of BC** |  |  |  |
| **No** | 27 (29.4) | 2 (25.0) | 3 (42.9) |
| **Yes** | 64 (70.3) | 4 (75.0) | 4 (57.1) |
| **Missing** | 1 (1.1) | 0 (0.0) | 0 (0.0) |
| **Site** |  |  |  |
| **JHU** | 27 (29.4) | 3 (50.0) | 7 (100.0) |
| **MSKCC** | 31 (33.7) | 2 (33.3) | 0 (0.0) |
| **Yale** | 34 (37.0) | 1 (16.7) | 0 (0.0) |

Abbreviations: BC, breast cancer; SD, standard deviation; BRCA, breast cancer susceptibility gene; STIC, serous tubal intraepithelial carcinoma; STIL, serous tubal intraepithelial lesion

STIL, serous tubal intraepithelial lesion; BC, breast cancer; JHU, Johns Hopkins University;

MSKCC, Memorial Sloan Kettering Cancer Center
